# Supplementary material
Source: publisher figshare collection journal article supplement (https://acs.figshare.com/ndownloader/files/4112302)
Supplement: Supplementary file 1 [file 4112302]

# Supplementary Data

## Counterion Effects on the Denaturing Activity of Guanidinium Cation to Protein

*Qiang Shao<sup>1,2</sup>, Yubo Fan<sup>3</sup>, Lijiang Yang<sup>1</sup> and Yi Qin Gao<sup>1\*</sup>*

<sup>1</sup>Institute of Theoretical and Computational Chemistry, College of Chemistry and Molecular Engineering,  
Beijing National Laboratory of Molecular Sciences, Peking University, Beijing 100871, China

<sup>2</sup>Drug Discovery and Design Center, Shanghai Institute of Materia Medica, Chinese Academy of Sciences, 555  
Zuchongzhi Road, Shanghai, 201203, China

<sup>3</sup>Bioinformatics and Bioengineering Program, The Methodist Hospital Research Institute, Weill Cornell  
Medical College, Houston, TX, 77030, USA

\*To whom correspondence should be addressed. Tel: +86-010-62752431. E-mail: gaoyq@pku.edu.cn

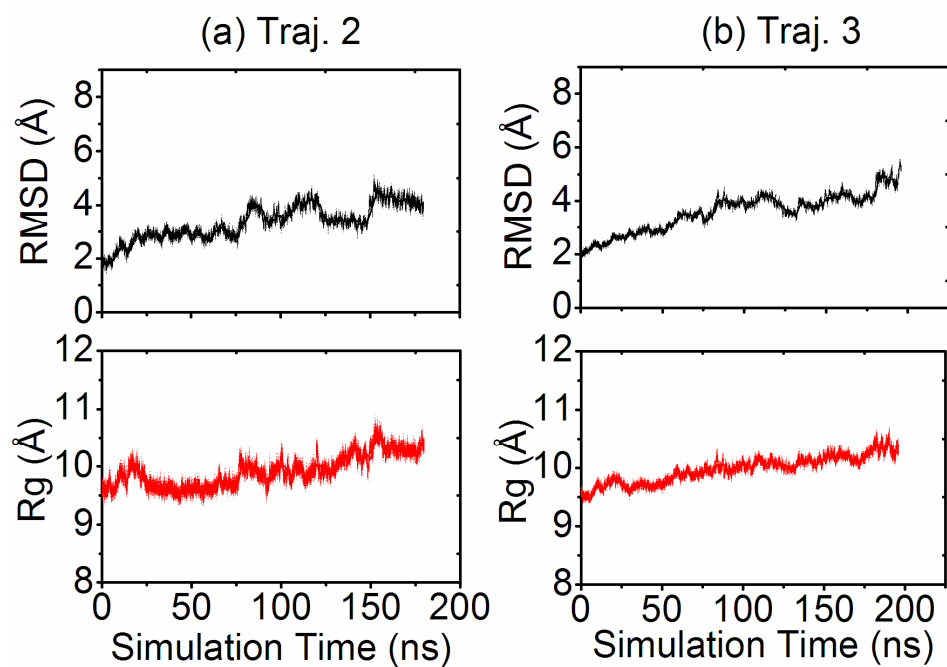

Figure S1. RMSD (top panel), and  $R_g$  (bottom panel) of BdpA as a function of simulation time from (a) the second and (b) the third independent simulation trajectories of GdmSCN solution.

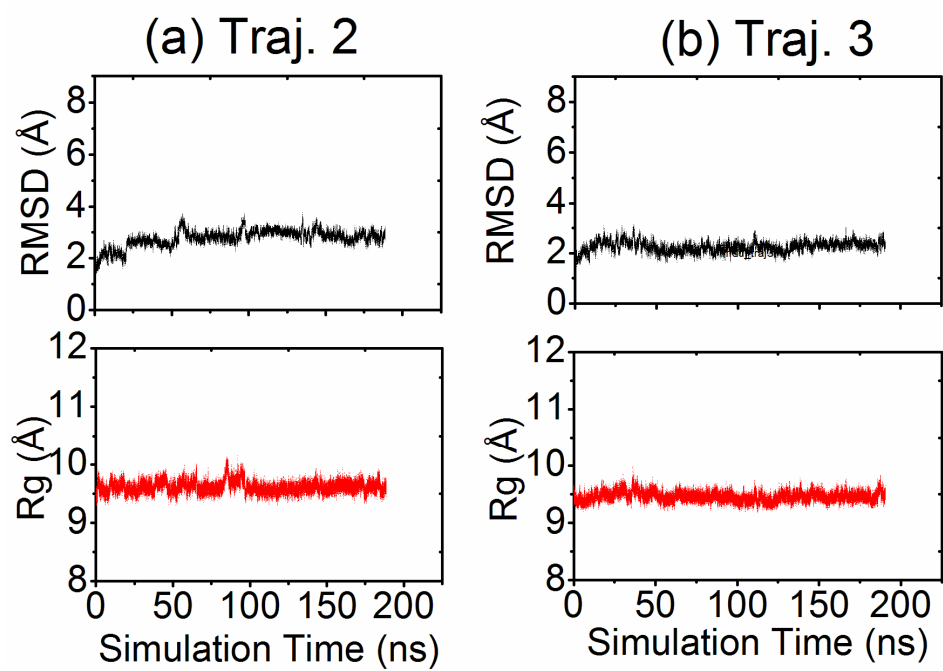

Figure S2. RMSD (top panel), and  $R_g$  (bottom panel) of BdpA as a function of simulation time from (a) the second and (b) the third independent simulation trajectories of GdmCl solution.

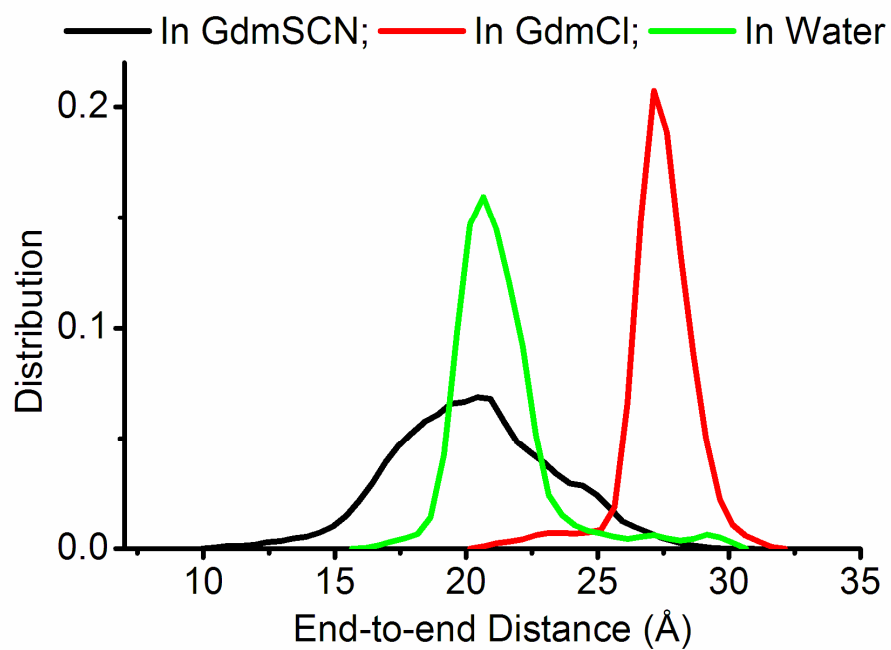

Figure S3. The end-to-end distance distribution of BdpA in three solutions (GdmSCN, GdmCl, and pure water).

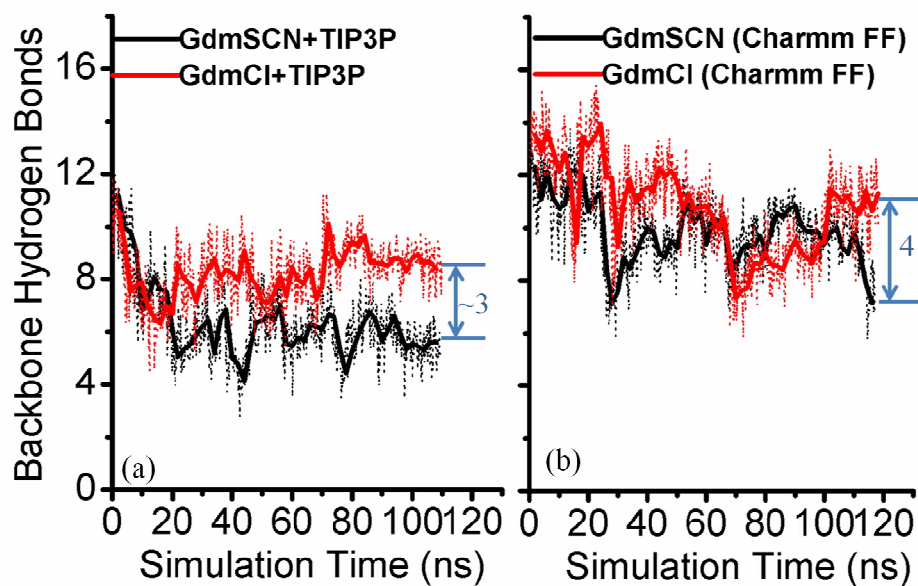

Figure S4. The total number of backbone hydrogen bonds formed in BdpA as a function of simulation time in (a) GdmSCN and GdmCl solutions using Gdm<sup>+</sup> force field of Jorgensen et al. (Ref.1) and TIP3P explicit solvent model, (b) GdmSCN and GdmCl solutions using Gdm<sup>+</sup> force field of MacKerell et al. (Ref.2) and SPC/E explicit solvent model, respectively.

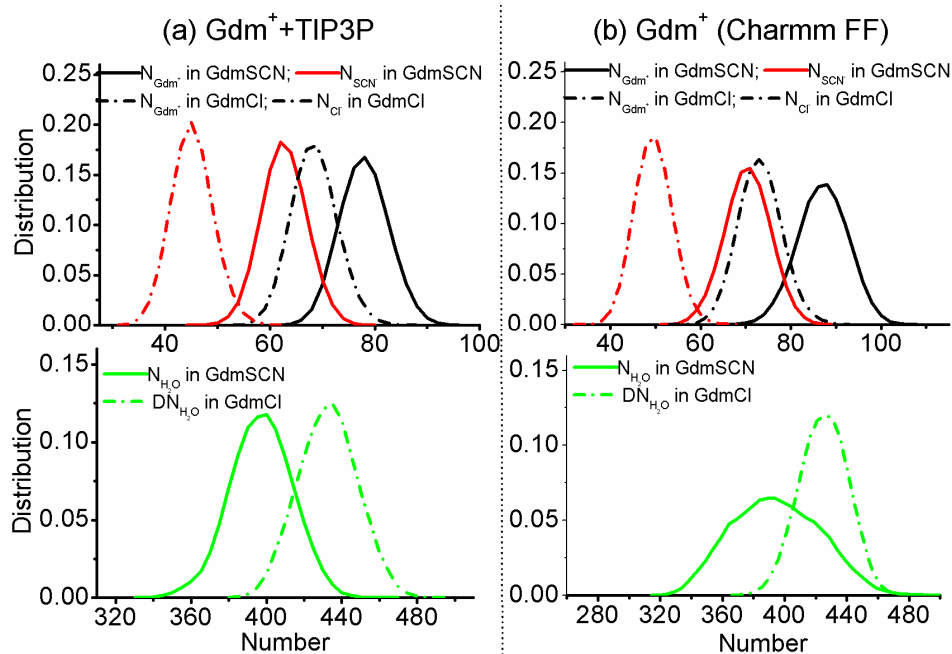

Figure S5. The distribution of the number of Gdm<sup>+</sup> cations, SCN<sup>-</sup> (Cl<sup>-</sup>) anions, and water molecules within 6 Å of protein surface in GdmSCN (GdmCl) solutions using Gdm<sup>+</sup> force field of Jorgensen et al. (Ref.1) and TIP3P explicit solvent model, and using Gdm<sup>+</sup> force field of MacKerell et al. (Ref.2) and SPC/E explicit solvent model, respectively.

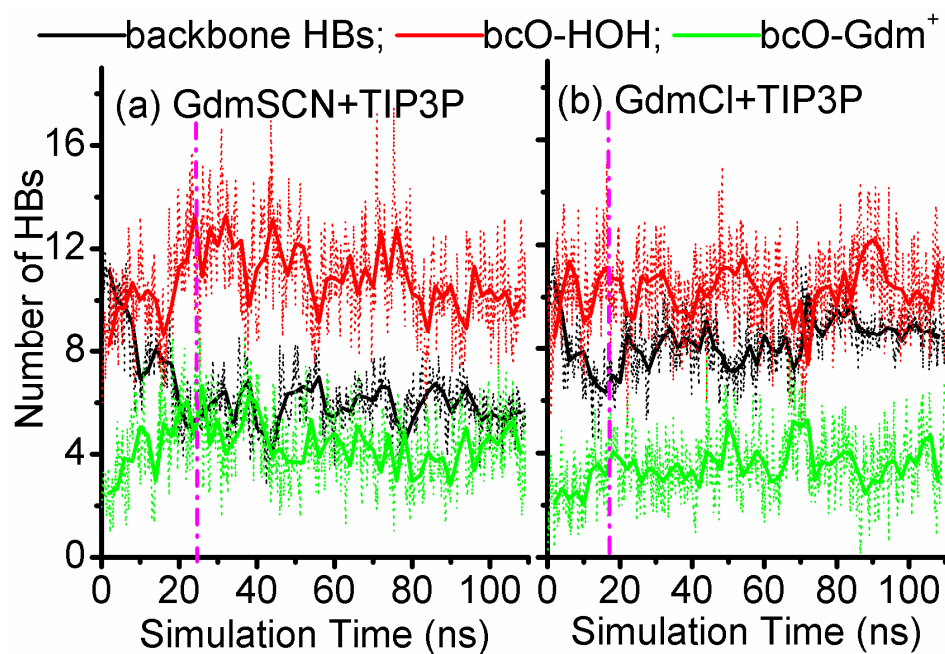

Figure S6. The breaking and formation of hydrogen bonds for residues involved in all backbone hydrogen bonds of BdpA in (a) GdmSCN and (b) GdmCl solutions using Gdm<sup>+</sup> force field of Jorgensen et al. (Ref.1) and TIP3P explicit solvent model. (Back line: the number of backbone hydrogen bonds; red line: the number of hydrogen bonds formed between carbonyl groups and water as hydrogen bonding donor; green line: the number of hydrogen bonds formed between carbonyl groups and Gdm<sup>+</sup> as hydrogen bonding donor).

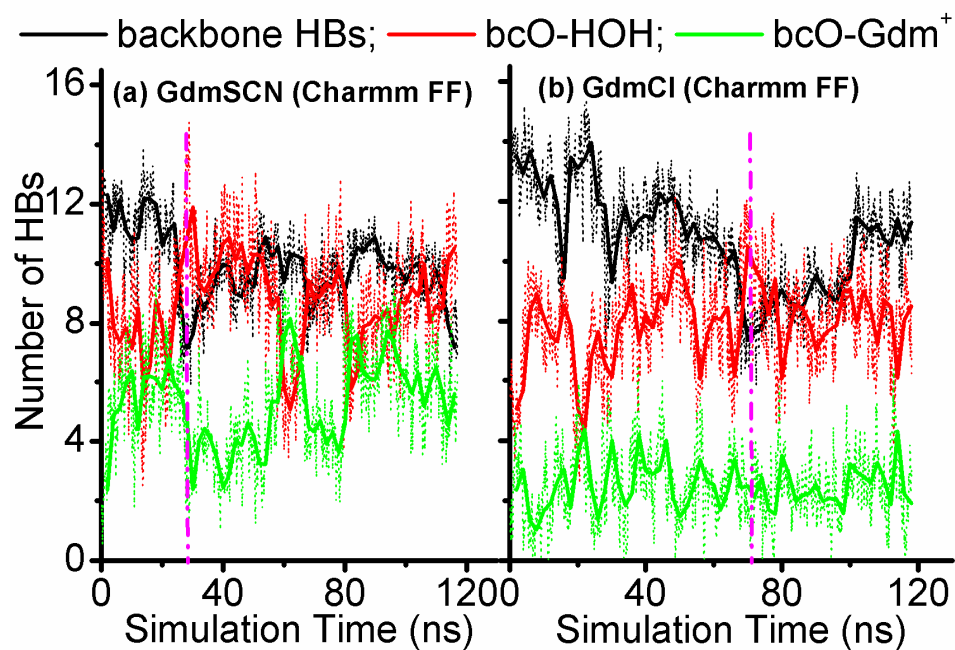

Figure S7. The breaking and formation of hydrogen bonds for residues involved in all backbone hydrogen bonds of BdpA in (a) GdmSCN and (b) GdmCl solutions using Gdm<sup>+</sup> force field of MacKerell et al. (Ref.2) and SPC/E explicit solvent model. (Back line: the number of backbone hydrogen bonds; red line: the number of hydrogen bonds formed between carbonyl groups and water as hydrogen bonding donor; green line: the number of hydrogen bonds formed between carbonyl groups and Gdm<sup>+</sup> as hydrogen bonding donor).



## Reference

1. Jorgensen, W. L.; Tiradorives, J. *J. Am. Chem. Soc.* **1988**, 110, 1657-1666.
2. MacKerell, A. D.; Bashford, D.; Bellott, M.; Dunbrack, R. L.; Evanseck, J. D.; Field, M. J.; Fischer, S.; Gao, J.; Guo, H.; Ha, S.; Joseph-McCarthy, D.; Kuchnir, L.; Kuczera, K.; Lau, F. T. K.; Mattos, C.; Michnick, S.; Ngo, T.; Nguyen, D. T.; Prodhom, B.; Reiher, W. E.; Roux, B.; Schlenkrich, M.; Smith, J. C.; Stote, R.; Straub, J.; Watanabe, M.; Wiorkiewicz-Kuczera, J.; Yin, D.; Karplus, M. *J. Phys. Chem. B* **1998**, 102, 3586-3616.
